# Supplementary material for: Application of ionic mesoporous silica in selective recovery of tungstate ions through column adsorption and subsequent photocatalytic degradation of an organic dye
Source: Royal Society of Chemistry journal article supplement (doi:10.1039/d3en00053b), 2023-01-01
Supplement: d3en00053b1.pdf [file d3en00053b1.pdf]

SUPPORTING INFORMATION

---

**Application of Ionic Mesoporous Silica in Selective Recovery of Tungstate  
Ions through Column Adsorption and Subsequent Photocatalytic Degradation  
of an Organic Dye**

Manish K. Dinker, Sandesh S. Raut and Prashant S. Kulkarni\*

Energy and Environment Laboratory, Department of Applied Chemistry, Defence Institute of  
Advanced Technology, Girinagar, Pune-411025, India

\*Email: [ps\\_kulkarni@rediffmail.com](mailto:ps_kulkarni@rediffmail.com), [pskulkarni@diat.ac.in](mailto:pskulkarni@diat.ac.in); Tel: +91 20 2430 4161; Fax: +91 20 2438 9509

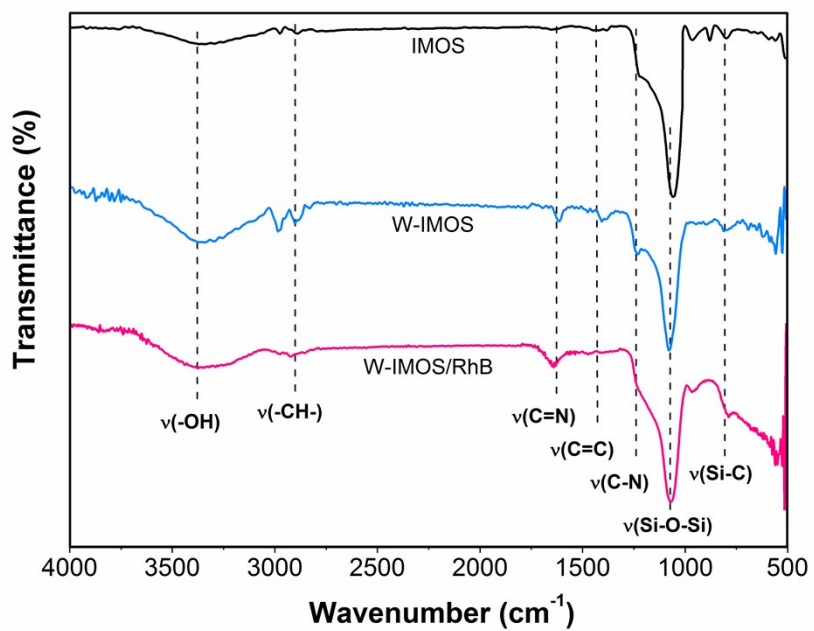

**Figure S1.** FT-IR spectra of IMOS nanoparticles obtained before and after tungstate adsorption and photocatalytic degradation of RhB molecules.

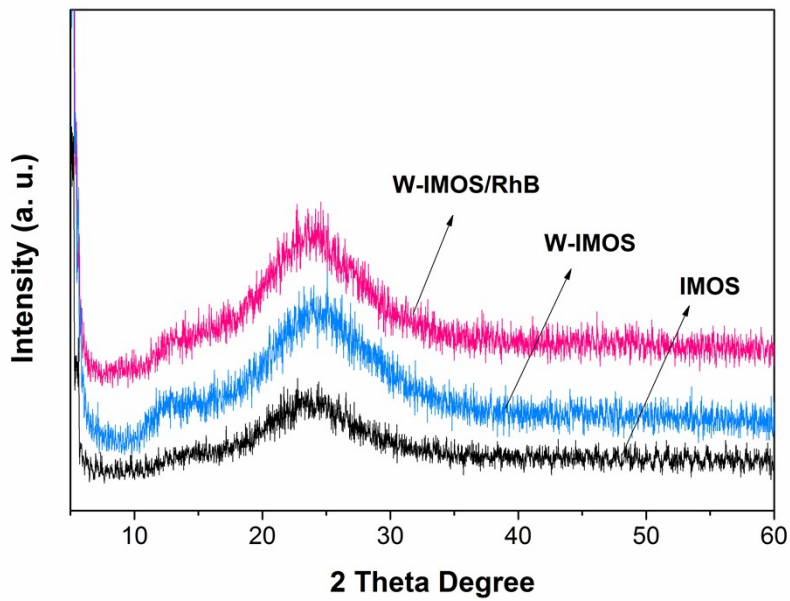

**Figure S2.** Wide-angle XRD spectra of IMOS nanoparticles obtained before and after tungstate adsorption (W-IMOS) and photocatalytic degradation of RhB molecules (W-IMOS/RhB).

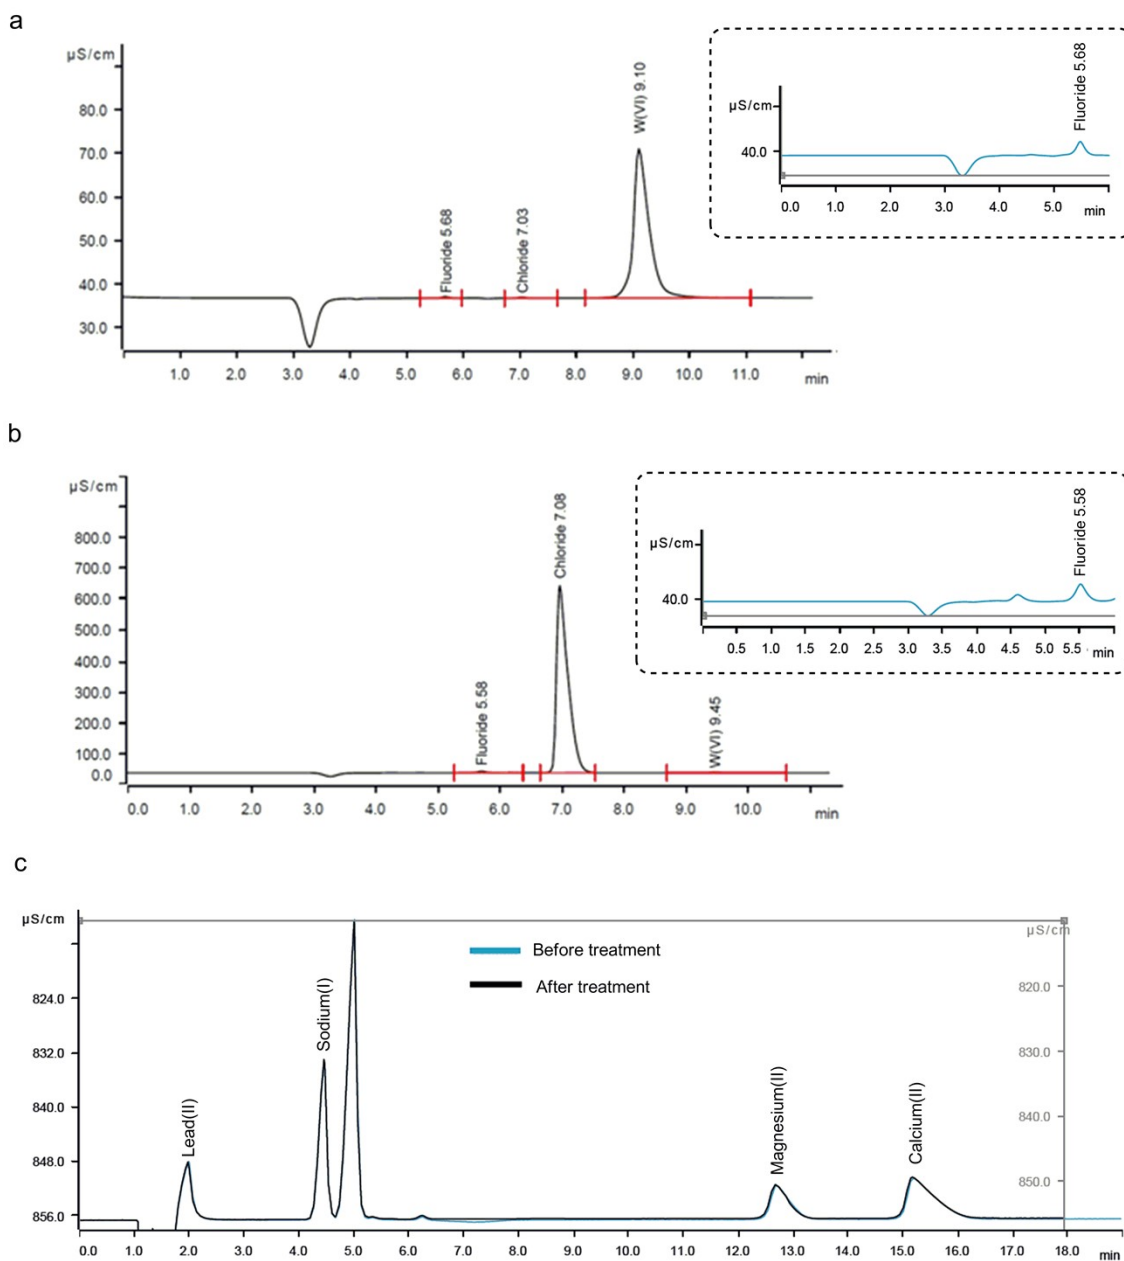

**Figure S3.** Ion chromatograms obtained of wastewater (a) before, and (b) after the treatment using IMOS nanomaterial illustrating the adsorption of W(VI) via anion-exchange mechanism. Insets are the magnified chromatograms depicting the peak intensity of fluoride ( $\text{F}^-$ ) which remain unchanged before and after the wastewater treatment, and thus, substantiate the selective removal of W(VI). (C) Compared Ion chromatograms of wastewater depicting the available cations before and after the treatment. It confirms the selective adsorption of W(VI) as there is no difference in the peak intensity of cations before and after the treatment using IMOS nanomaterial.

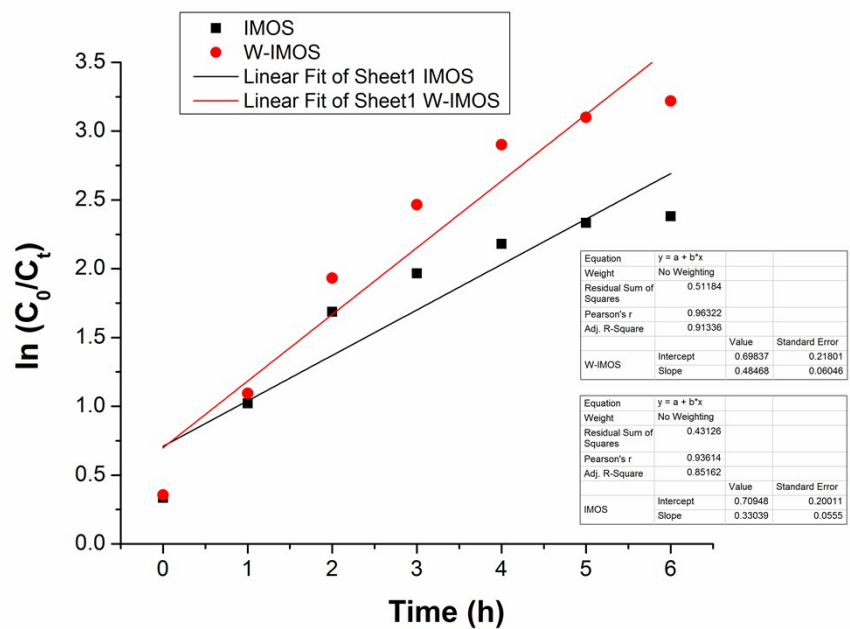

**Figure S4.** First order kinetic plot for the photo-degradation of RhB molecules in aqueous solutions using IMOS and W-IMOS nanoparticles.

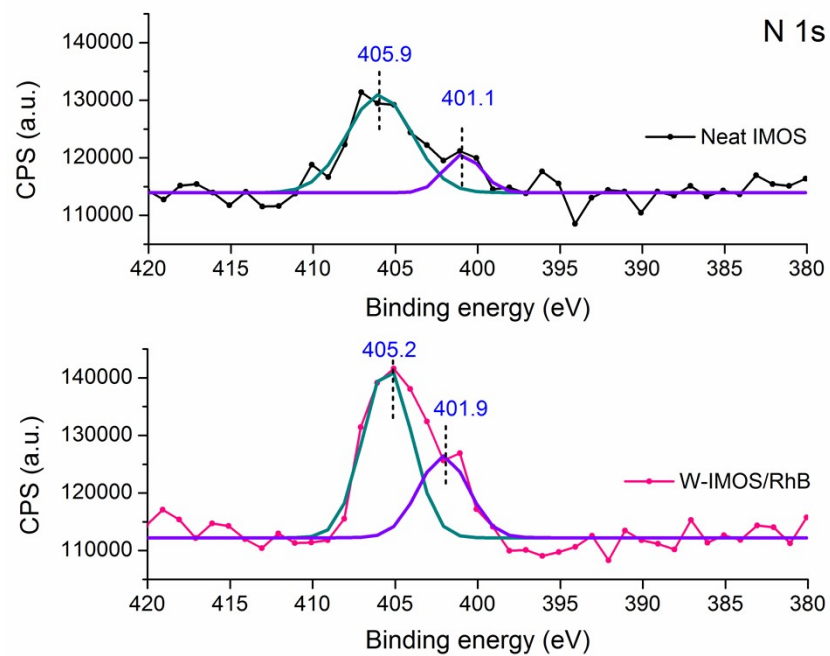

**Figure S5.** XPS spectra of N1s from IMOS before and after the successive adsorption of W(VI) and photocatalytic degradation of RhB dye.

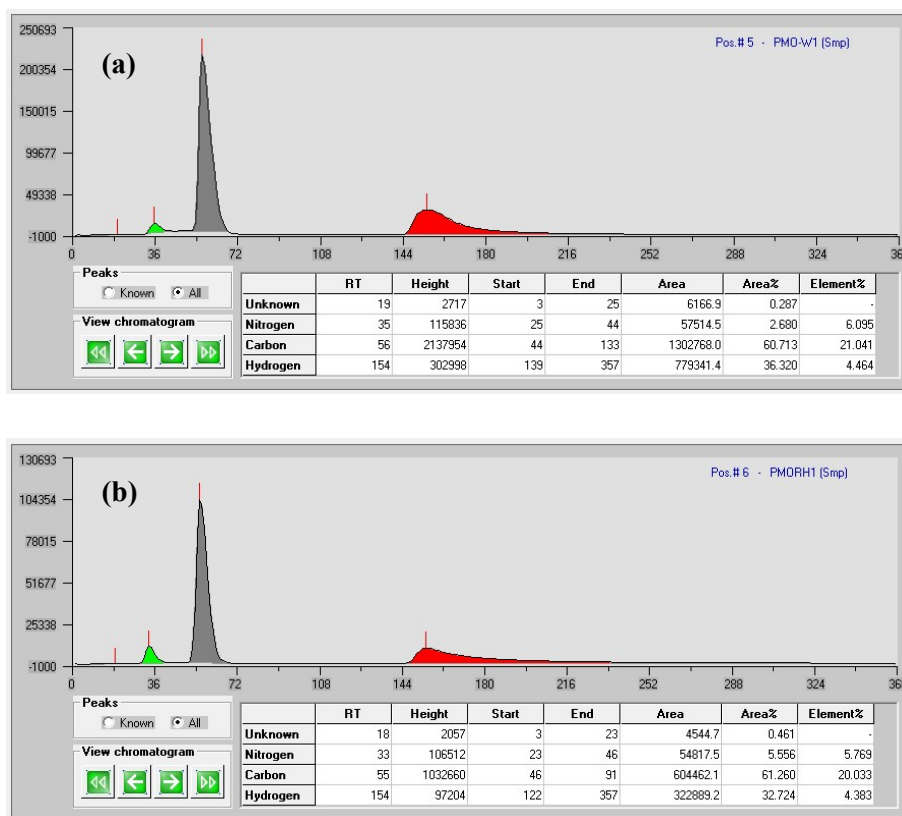

**Figure S6.** Chromatograms of W-IMOS nanoparticles obtained using CHN analyzer (a) before, and (b) after the photocatalytic degradation of RhB.

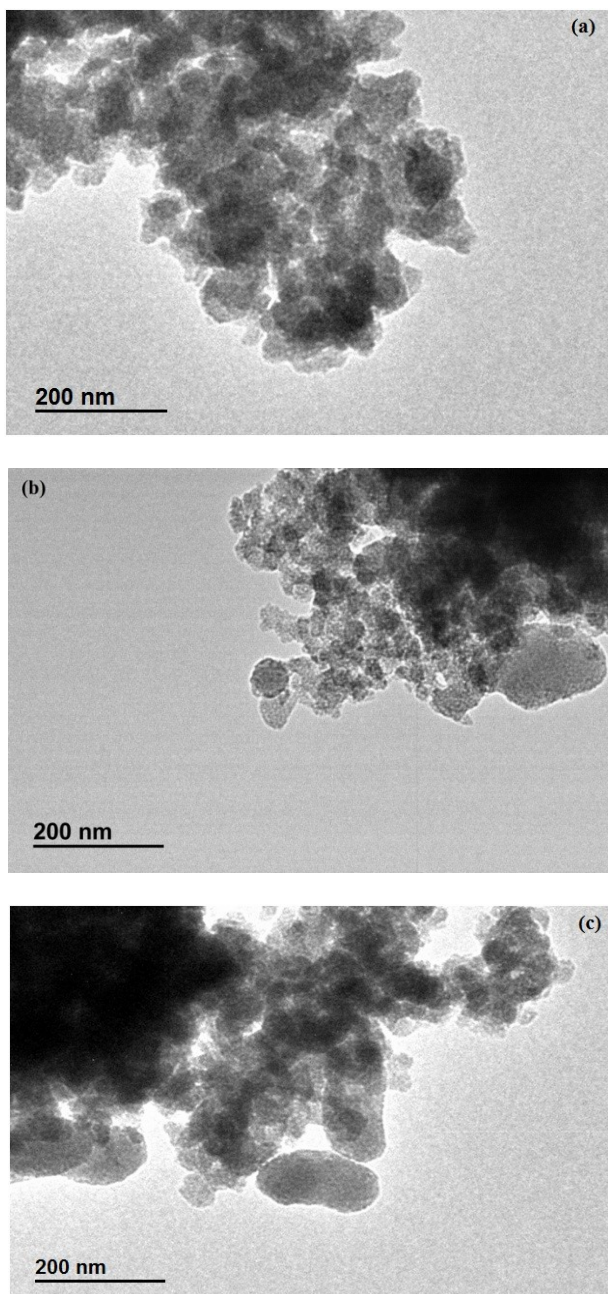

**Figure S7.** TEM images of IMOS nanoparticles (a) before, and (b) after tungsten immobilization from e-waste recycling unit wastewater, and (c) photocatalytic degradation of RhB.



**Table S1.** Chemical analysis of e-waste recycling unit wastewater using Ion chromatography.

| Types of ions                          | Anions         |                 |                               | Cations          |                              |                 |                |                  |                  |                  |                  |                  |
|----------------------------------------|----------------|-----------------|-------------------------------|------------------|------------------------------|-----------------|----------------|------------------|------------------|------------------|------------------|------------------|
|                                        | F <sup>-</sup> | Cl <sup>-</sup> | WO <sub>4</sub> <sup>2-</sup> | Pb <sup>2+</sup> | NH <sub>4</sub> <sup>+</sup> | Na <sup>+</sup> | K <sup>+</sup> | Mg <sup>2+</sup> | Ca <sup>2+</sup> | Cu <sup>2+</sup> | Zn <sup>2+</sup> | Mn <sup>2+</sup> |
| Concentration<br>(mg L <sup>-1</sup> ) | 10.00          | 38.97           | 563.63                        | 130.00           | 0.03                         | 5.28            | 0.51           | 4.13             | 5.04             | 5.4              | 0.14             | 0.07             |

**Table S2.** Comparison of present IMOS with other sorbents for the separation of W(VI) by continuous mode adsorption process.

| <b>Types of sorbents</b> | <b>Feed phase conc. (mg L<sup>-1</sup>)</b> | <b>Liquor type</b> | <b>pH</b> | <b>Bed depth (cm)</b> | <b>Flow rate (mL min<sup>-1</sup>)</b> | <b>Q<sub>o</sub>(exp) (mg g<sup>-1</sup>)</b> | <b>Ref.</b> |
|--------------------------|---------------------------------------------|--------------------|-----------|-----------------------|----------------------------------------|-----------------------------------------------|-------------|
| BPQAM                    | 400                                         | Aqueous            | 6.0       | –                     | 2.5                                    | 65.0                                          | 10          |
| Amberlite IRA 900        | 500                                         | Aqueous            | 7.0       | 25.0                  | 8.0                                    | 130.0                                         | 14          |
| Resin D403               | 730                                         | Molybdate solution | 9.6       | 102.0                 | 0.5                                    | –                                             | 30          |
|                          | 800                                         |                    | 9.5       |                       |                                        | –                                             |             |
| IMOS                     | 563                                         | Wastewater         | 6.2       | 3.0                   | 3.0                                    | 123.2                                         | This study  |
